# Supplementary material for: (Super)gelators derived from push–pull chromophores: synthesis, gelling properties and second harmonic generation
Source: Royal Society of Chemistry journal article supplement (doi:10.1039/c8ob00251g), 2018-01-01
Supplement: c8ob00251g1.pdf [file c8ob00251g1.pdf]

## (Super)Gelators derived from push-pull chromophores: Synthesis, gelling properties and second harmonic generation

A.Belén Marco,<sup>a</sup> Denis Gindre,<sup>b</sup> Konstantinos Iliopoulos,<sup>b</sup> Santiago Franco,<sup>a</sup> Raquel Andreu,<sup>\*,a</sup> David Canevet<sup>\*,b</sup> Marc Sallé<sup>\*,a</sup>

<sup>a</sup> Departamento de Química Orgánica, ICMA, Universidad de Zaragoza-CSIC, 50009 Zaragoza, Spain.

<sup>b</sup> Laboratoire MOLTECH-Anjou, Université d'Angers, UMR CNRS 6200, 2 bd Lavoisier, 49045 Angers Cedex, France.

|                                                                                                                                                                               |     |
|-------------------------------------------------------------------------------------------------------------------------------------------------------------------------------|-----|
| <b>Table S1</b> Tested conditions to synthesize chromophore <b>1</b>                                                                                                          | S2  |
| <b>Scheme S1</b> Chemical structure of the regioisomer of gelator <b>1</b> .                                                                                                  | S2  |
| <b>Table S2</b> Solvents under consideration for the gelation studies and their Hansen solubility parameters.                                                                 | S2  |
| <b>Fig. S1</b> Solubility data for compounds <b>1'</b> (left) and <b>2</b> (right) in the Hansen space.                                                                       | S3  |
| <b>Fig. S2</b> Projection of the Hansen space according to the $\delta_d$ axis with solubility data for gelator <b>2</b> .                                                    | S3  |
| <b>Fig. S3</b> Optical micrographs of <b>1'</b> -based xerogels prepared from the different gelled solvents.                                                                  | S4  |
| <b>Fig. S4</b> Optical micrographs of <b>2</b> -based xerogels prepared from the different gelled solvents.                                                                   | S5  |
| <b>Fig. S5</b> Scanning electron micrographs obtained from <b>1'</b> -based xerogels prepared from <i>o</i> -dichlorobenzene (left) and chloroform (right).                   | S5  |
| <b>Fig. S6</b> Optical micrographs of a <b>1'</b> -based xerogels prepared from 1,2,4-trichlorobenzene with non-polarized (left) and polarized light (right).                 | S6  |
| <b>Fig. S7</b> Optical micrographs of <b>1'</b> -based xerogels obtained from 1,2,4-trichlorobenzene (left – non-polarized light) and acetonitrile (right – polarized light). | S6  |
| <b>Fig. S8</b> Schematic representation of the modified second harmonic generation microscope.                                                                                | S7  |
| <b>Table S3</b> Optical and SHG micrographs of the xerogels prepared from <b>1'</b> .                                                                                         | S8  |
| <b>Table S4</b> Optical SHG micrographs of the xerogels prepared from <b>2</b> .                                                                                              | S9  |
| <b>Fig. S9</b> Effect of the polarization over the SHG response of xerogels-based microstructures derived from organogelator <b>1'</b> .                                      | S10 |
| Collection of NMR spectra                                                                                                                                                     | S11 |

**Table S1** Tested conditions to synthesize chromophore **1**.

|                                        |                                          |
|----------------------------------------|------------------------------------------|
| Ac <sub>2</sub> O, reflux              | Complex mixture ( <b>1</b> not detected) |
| EtOH, NEt <sub>3</sub> , reflux        | Complex mixture ( <b>1</b> not detected) |
| EtOH, r.t.                             | Grafting on position 3 (cf Scheme 5)     |
| AcOH, NEt <sub>3</sub> , reflux        | Complex mixture ( <b>1</b> not detected) |
| CHCl <sub>3</sub> , silica, microwaves | Grafting on position 3 (cf Scheme 5)     |

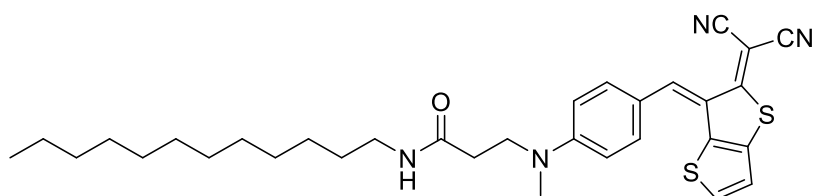**Scheme S1** Chemical structure of the regioisomer of gelator **1**.**Table S2** Solvents under consideration for the gelation studies and their Hansen solubility parameters.

| Solvents                  | $\delta_d$ | $\delta_H$ | $\delta_p$ |
|---------------------------|------------|------------|------------|
| 1,2-Dichlorobenzene       | 19.2495    | 3.3005     | 6.314      |
| Acetonitrile              | 15.334     | 6.109      | 18.04      |
| Chlorobenzene             | 19.0445    | 2.009      | 4.305      |
| Toluene                   | 18.04      | 2.009      | 1.394      |
| Acetone                   | 15.5       | 7          | 10.4       |
| 1,2,4-Trichlorobenzene    | 20.2       | 3.2        | 6          |
| <i>p</i> -Xylene          | 17.6       | 3.1        | 1          |
| 1,4-Dioxane               | 19         | 7.4        | 1.8        |
| Octan-1-ol                | 17         | 11.9       | 3.3        |
| Chloroform                | 17.835     | 5.7195     | 3.116      |
| Ethyl acetate             | 15.826     | 7.216      | 5.3095     |
| 1,1,2,2-Tetrachloroethane | 18.8       | 5.3        | 5.1        |
| Tetrachloromethane        | 17.835     | 0.5945     | 0          |
| Hexane                    | 14.92      | 0          | 0          |
| Cyclohexane               | 16.8305    | 0.205      | 0          |
| Tetrahydrofuran           | 16.8305    | 8.0155     | 5.7195     |
| Methanol                  | 15.129     | 22.345     | 12.3205    |
| Ethanol                   | 15.826     | 19.434     | 8.815      |
| Propan-2-ol               | 15.826     | 16.441     | 6.109      |

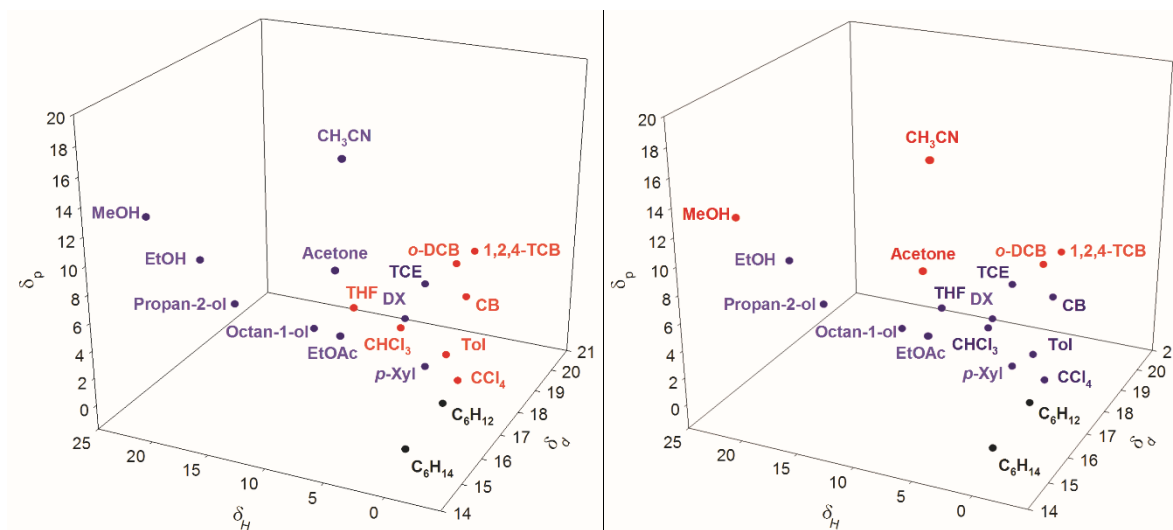

**Fig. S1** Solubility data for compounds **1'** (left) and **2** (right) in the Hansen space. Red for gelation, blue for precipitation, black for insoluble at high temperatures.

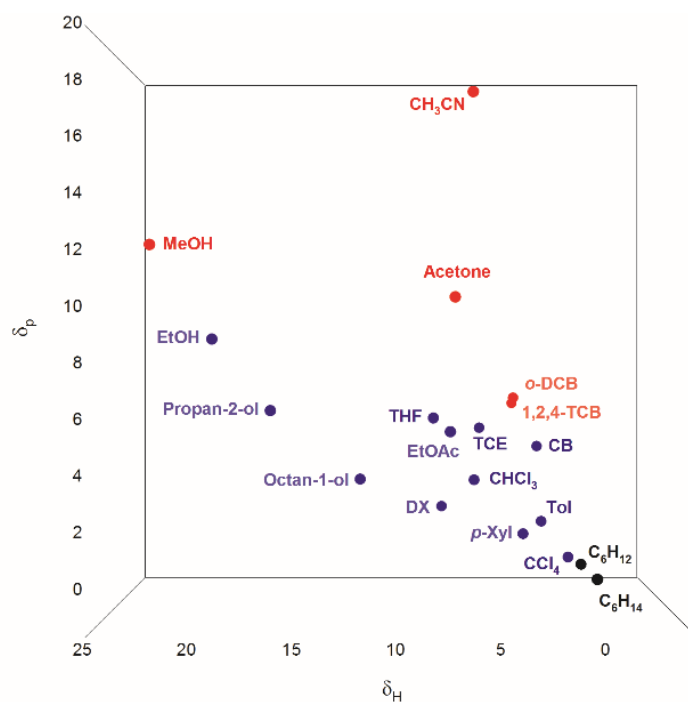

**Fig. S2** Projection of the Hansen space according to the  $\delta_d$  axis with solubility data for gelator **2**. Red for gelation, blue for precipitation, black for insoluble at high temperatures.

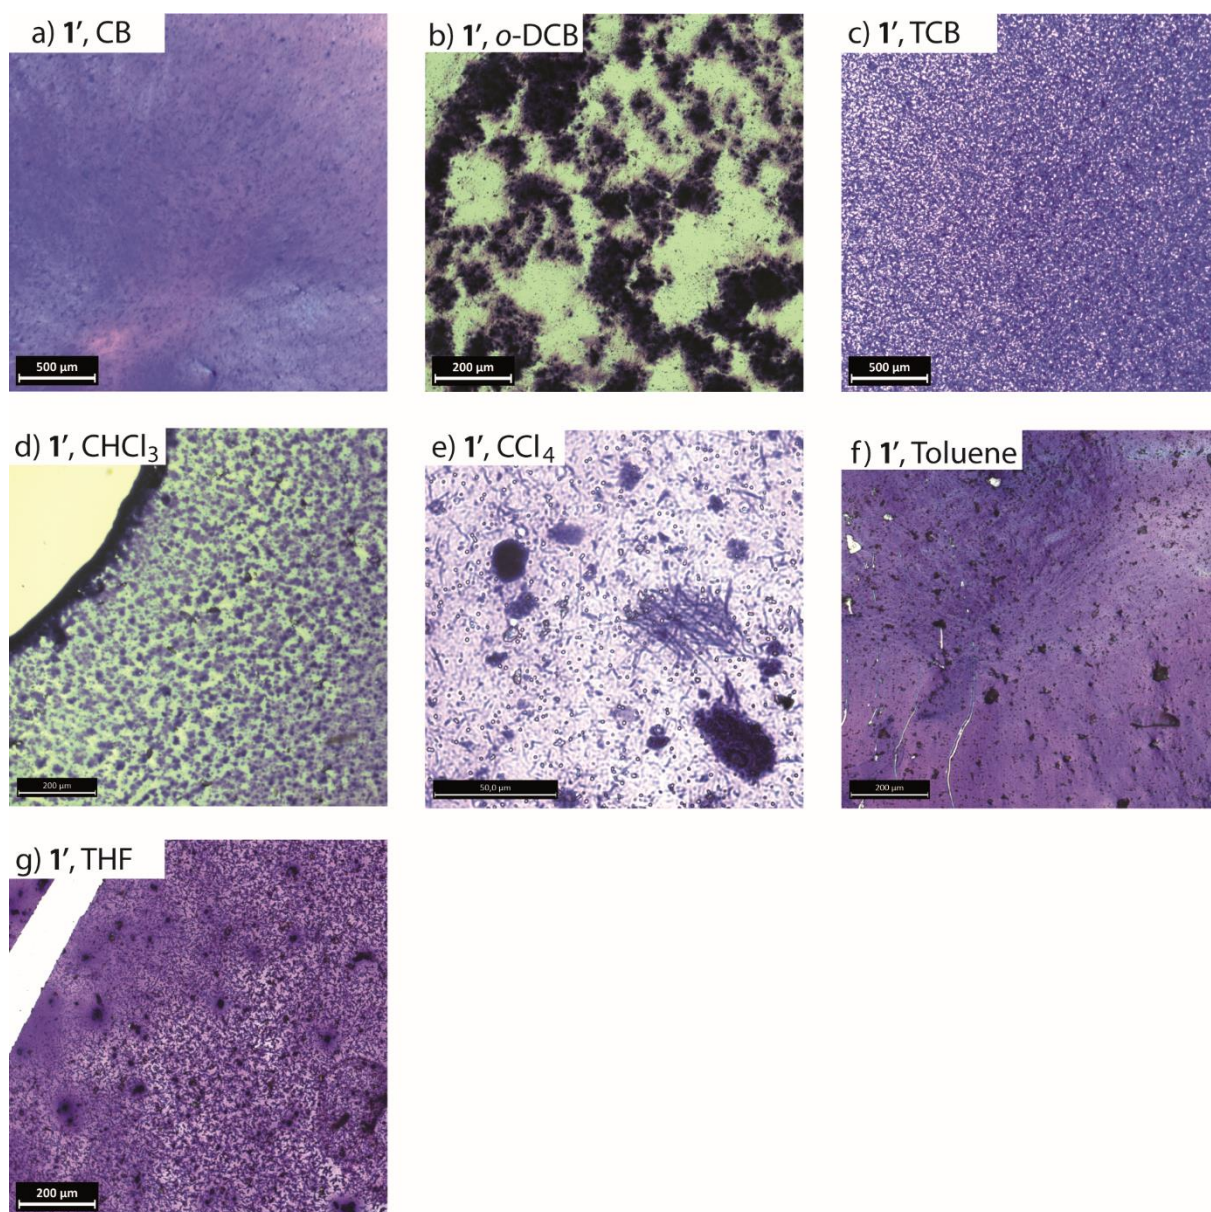

**Fig. S3** Optical micrographs of 1'-based xerogels prepared from the different gelled solvents.



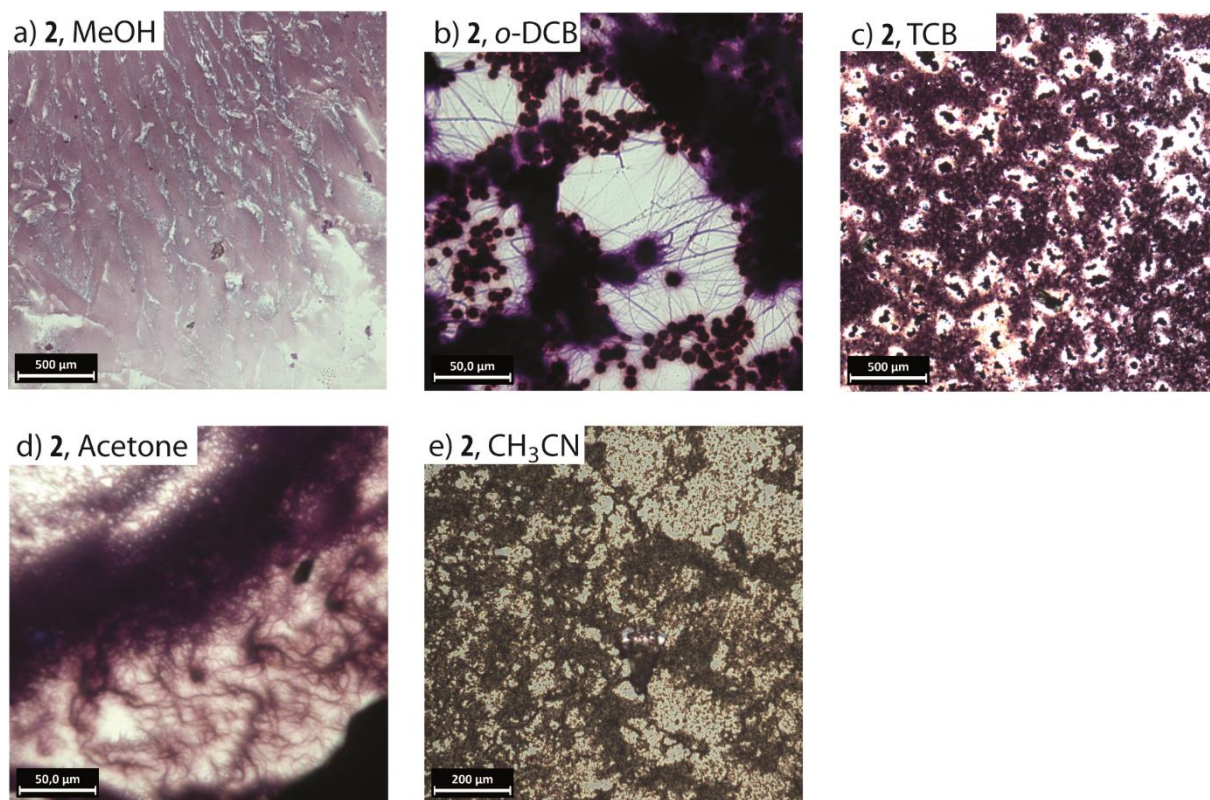

**Fig. S4** Optical micrographs of **2**-based xerogels prepared from the different gelled solvents.

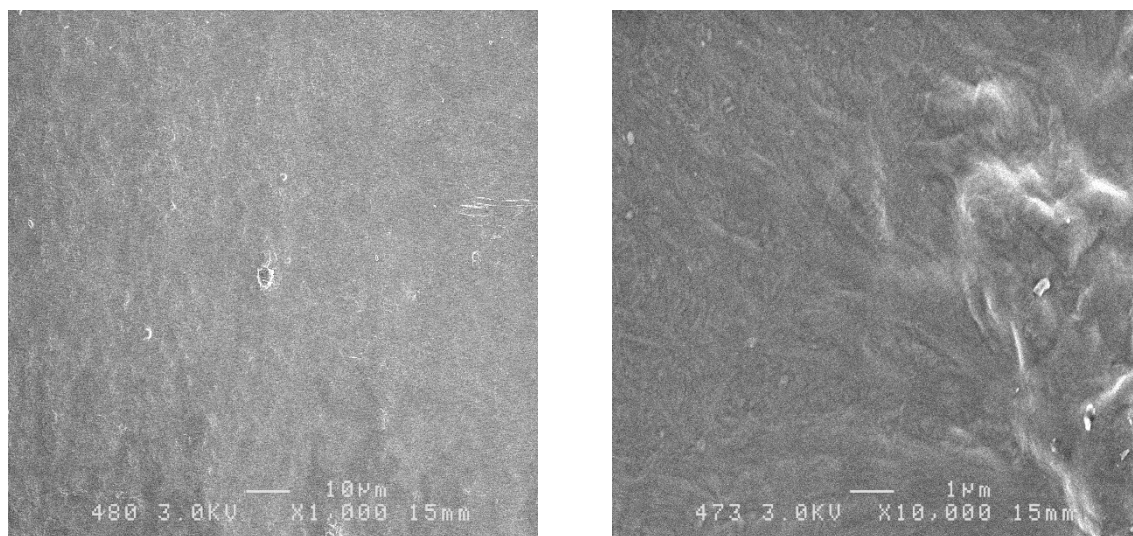

**Fig. S5** Scanning electron micrographs obtained from **1'**-based xerogels prepared from o-dichlorobenzene (left) and chloroform (right).

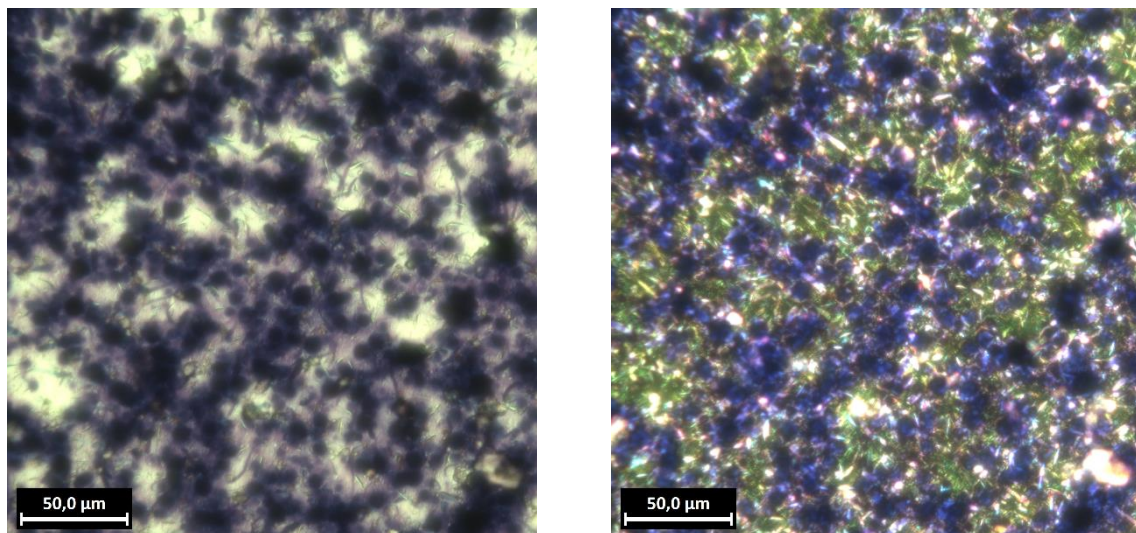

**Fig. S6** Optical micrographs of a **1'**-based xerogels prepared from 1,2,4-trichlorobenzene with non-polarized (left) and polarized light (right). Both images correspond to the same region.

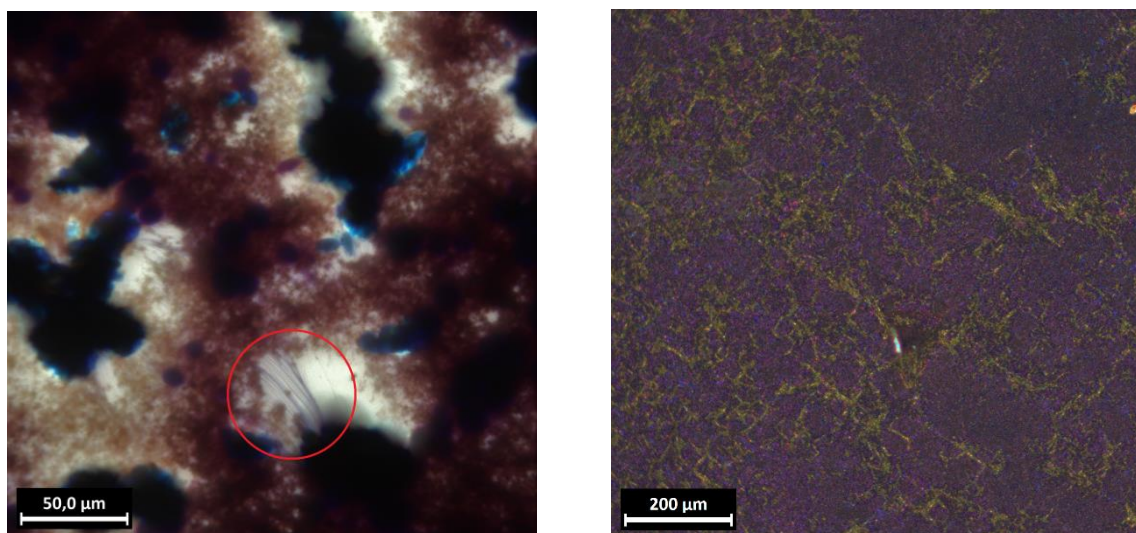

**Fig. S7** Optical micrographs of **2**-based xerogels obtained from 1,2,4-trichlorobenzene (left – non-polarized light) and acetonitrile (right – polarized light).



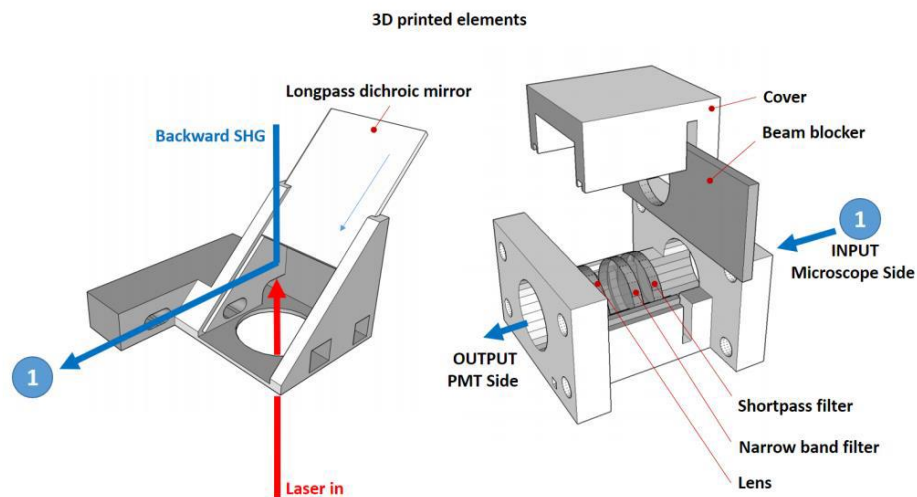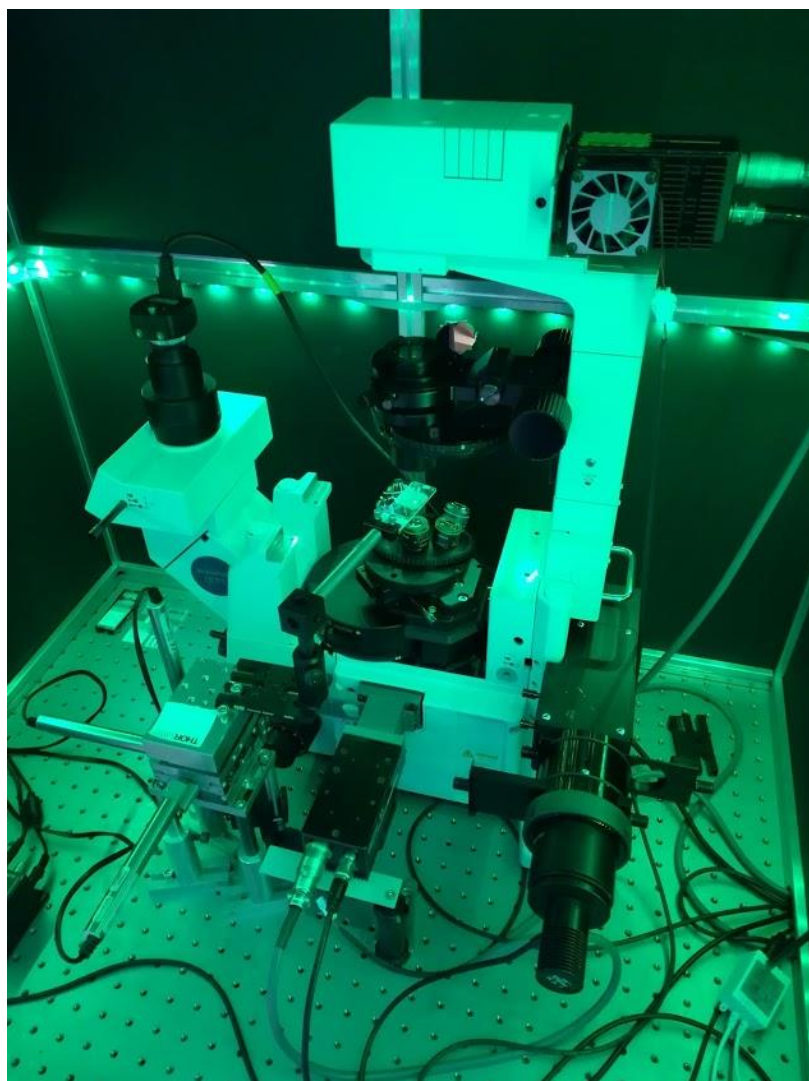

**Fig. S8** Schematic representation of the modified second harmonic generation microscope and a picture of the whole device.

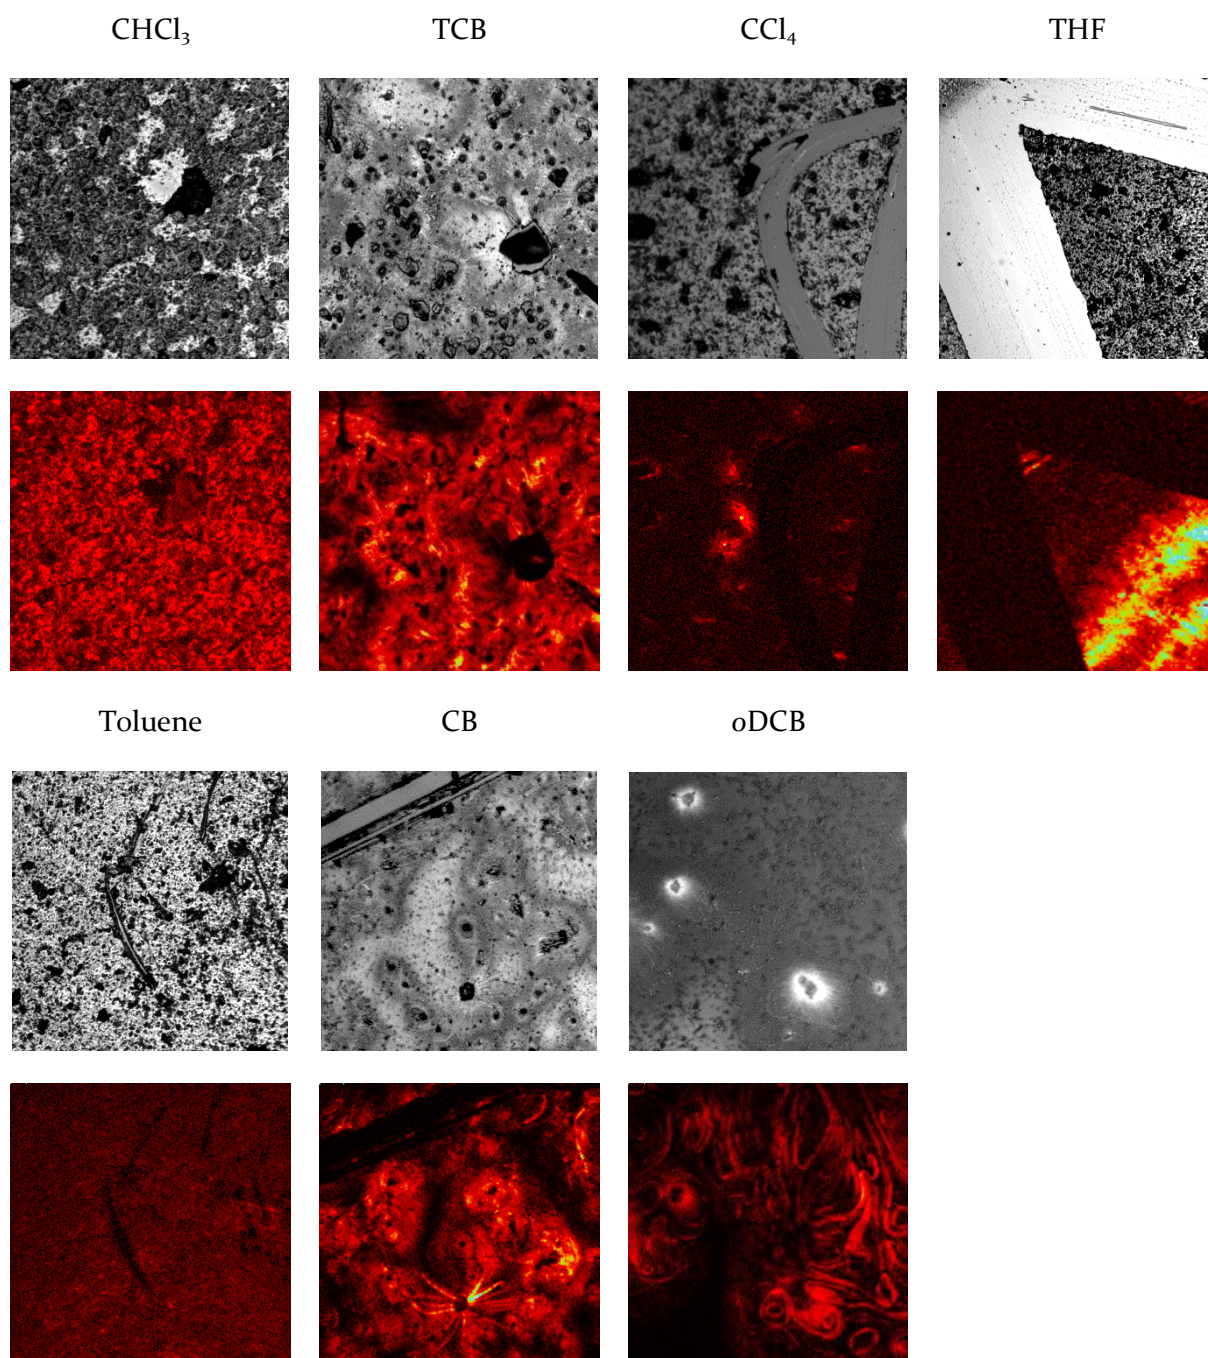

**Table S3** Optical and SHG micrographs of the xerogels prepared from **1'**. These images have the same scale and are 360  $\mu\text{m}$  wide.



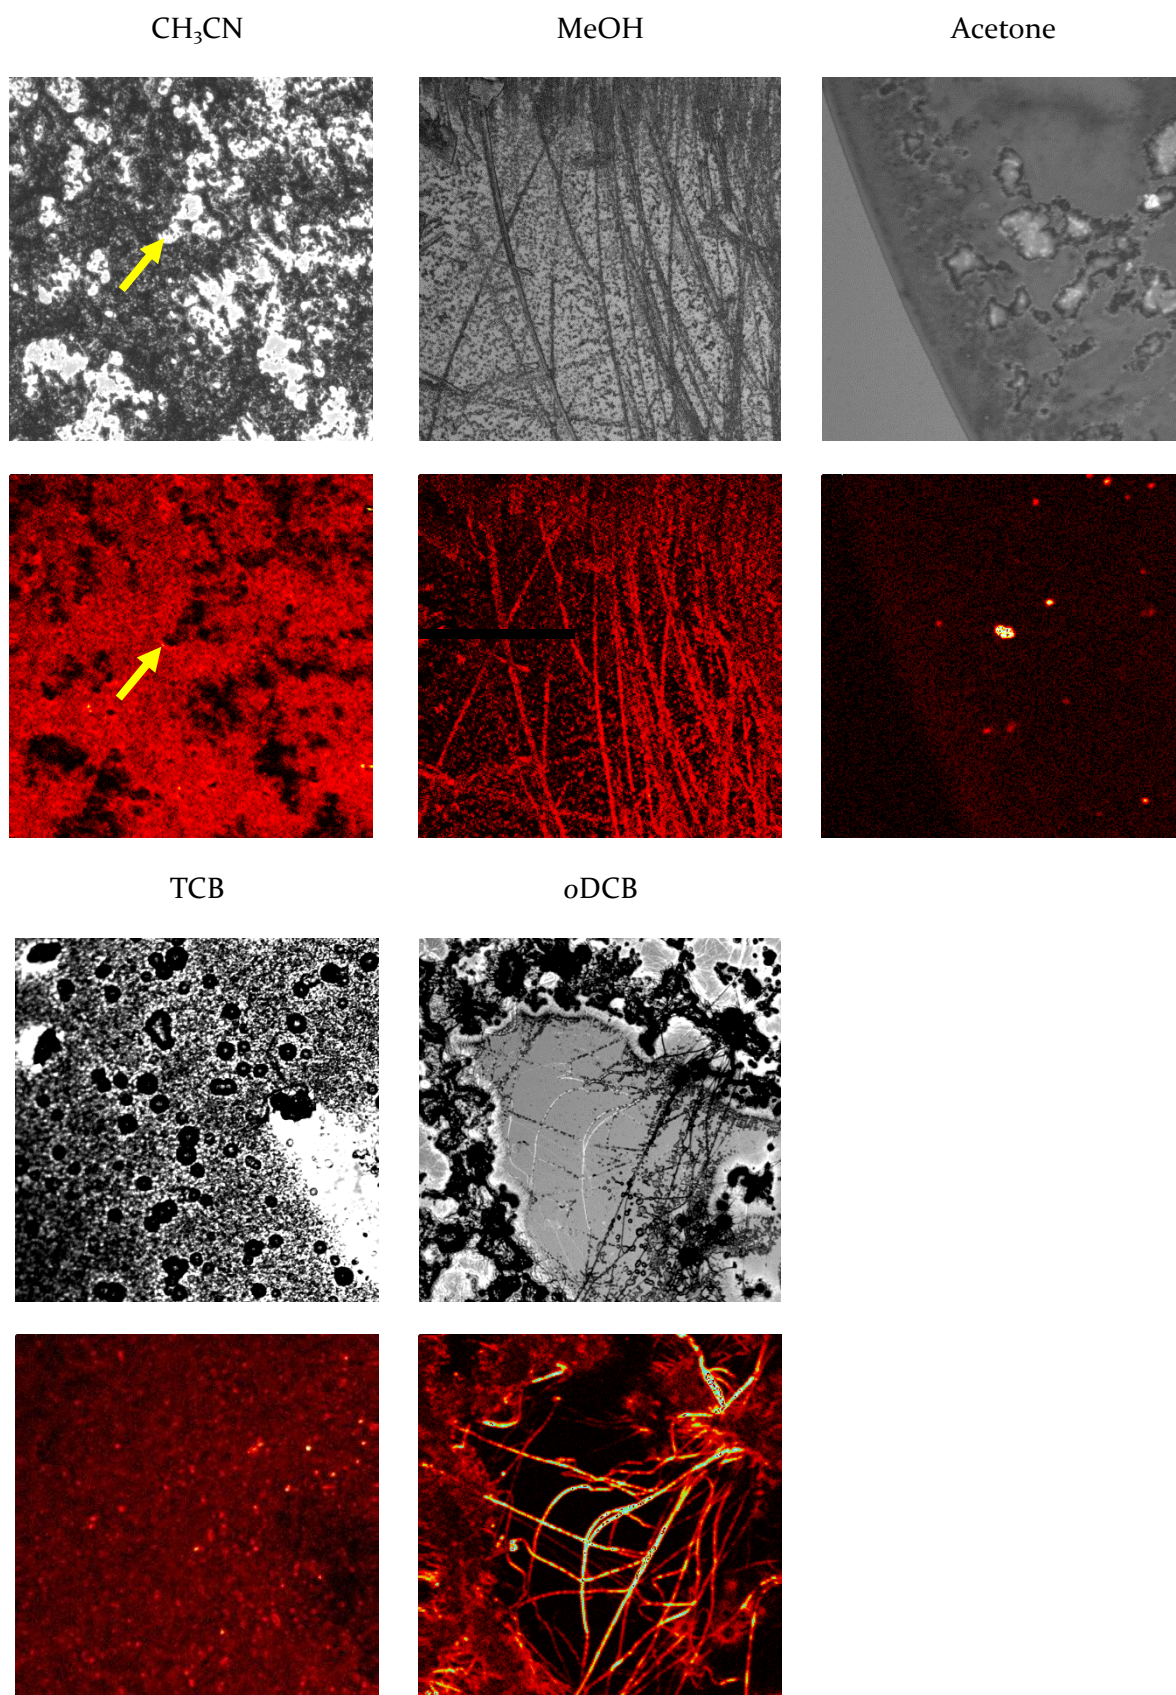

**Table S4** Optical SHG micrographs of the xerogels prepared from **2**. These images have the same scale and are 360  $\mu\text{m}$  wide. The yellow arrows highlight the same area of the sample prepared with acetonitrile.

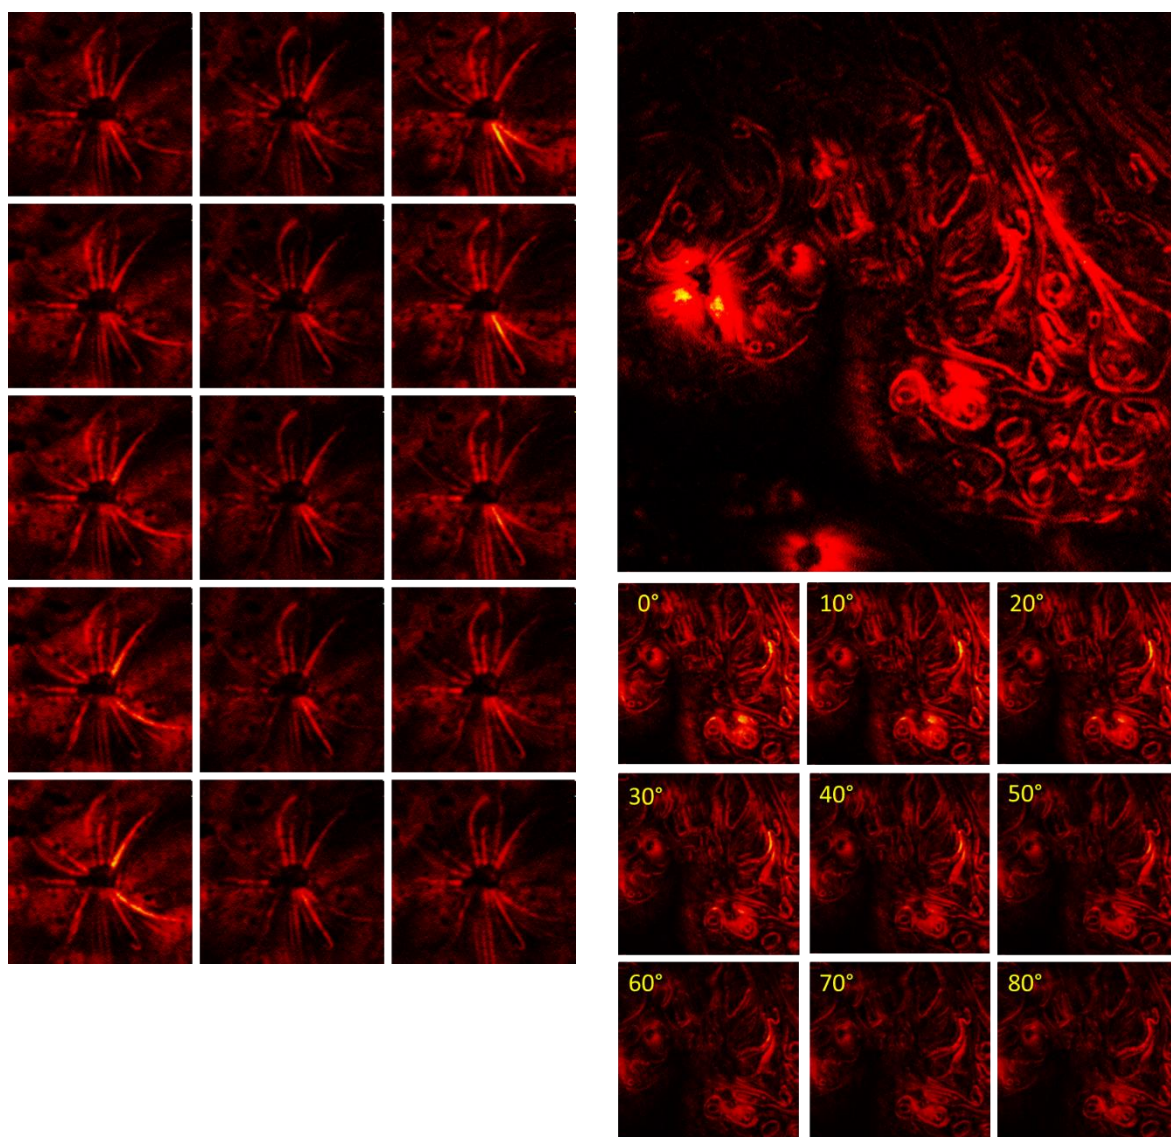

**Fig. S9** Effect of the polarization over the SHG response of xerogels-based microstructures derived from organogelator **1**.

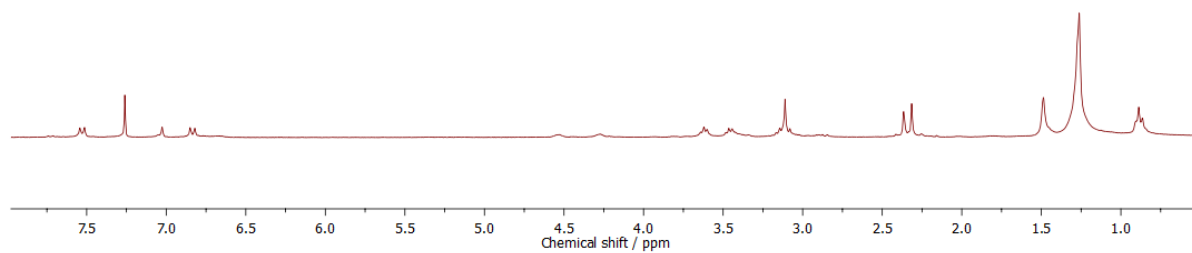

$^1\text{H}$  NMR spectrum of gelator **1'**,  $\text{CDCl}_3$ , 300 MHz

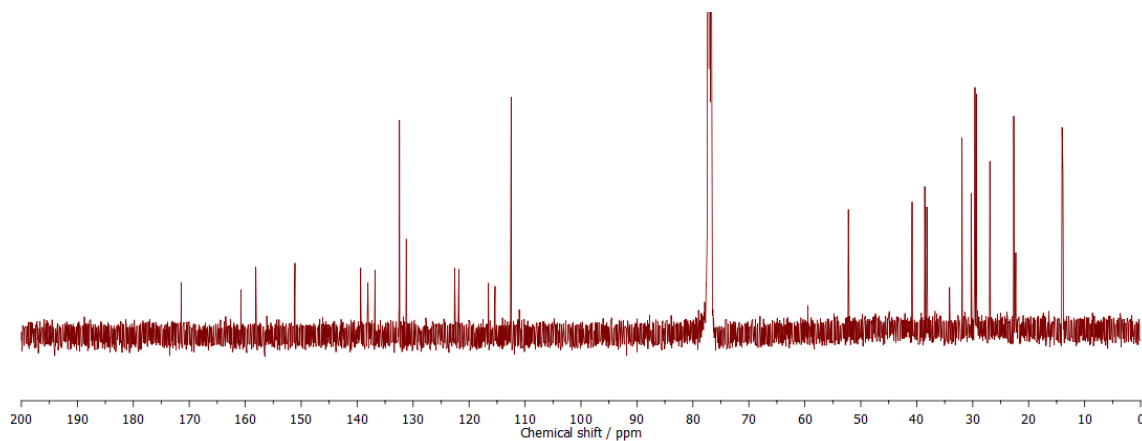

$^{13}\text{C}$  NMR spectrum of gelator **1'**,  $\text{CDCl}_3$ , 125 MHz, 323 K

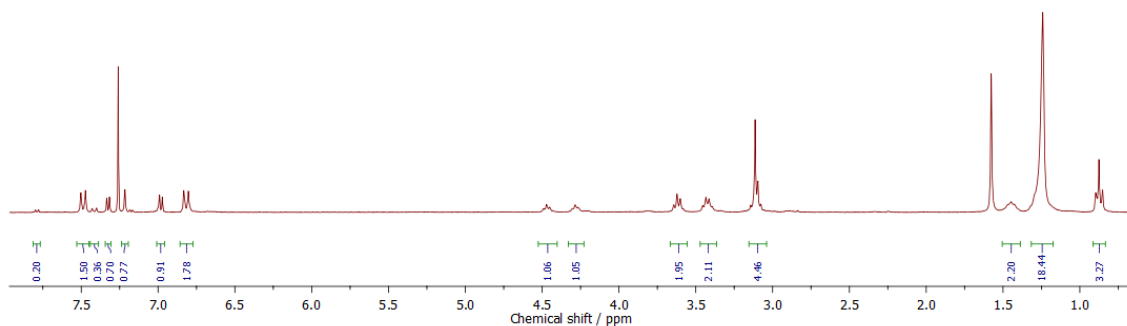

$^1\text{H}$  NMR spectrum of gelator **2**,  $\text{CDCl}_3$ , 300 MHz

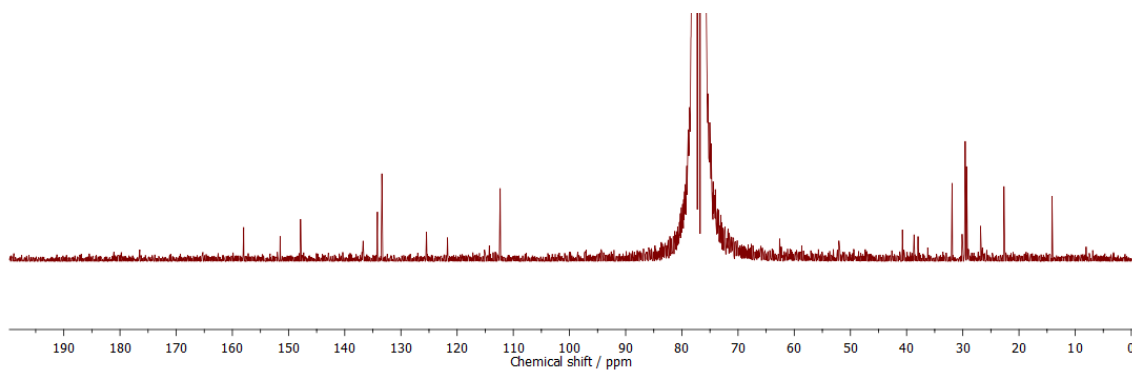

$^{13}\text{C}$  NMR spectrum of gelator **2**,  $\text{CDCl}_3$ , 75 MHz (Power phase correction of the MestReNova software)



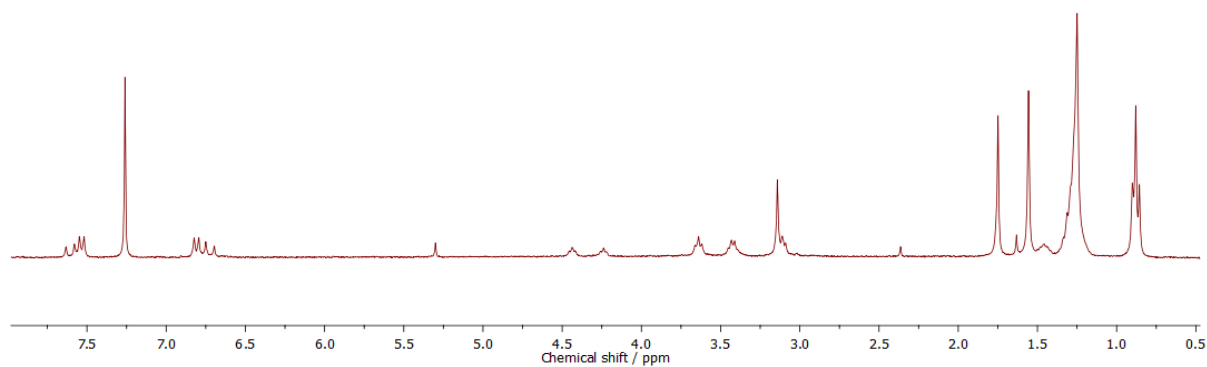

$^1\text{H}$  NMR spectrum of compound **3**,  $\text{CDCl}_3$ , 300 MHz

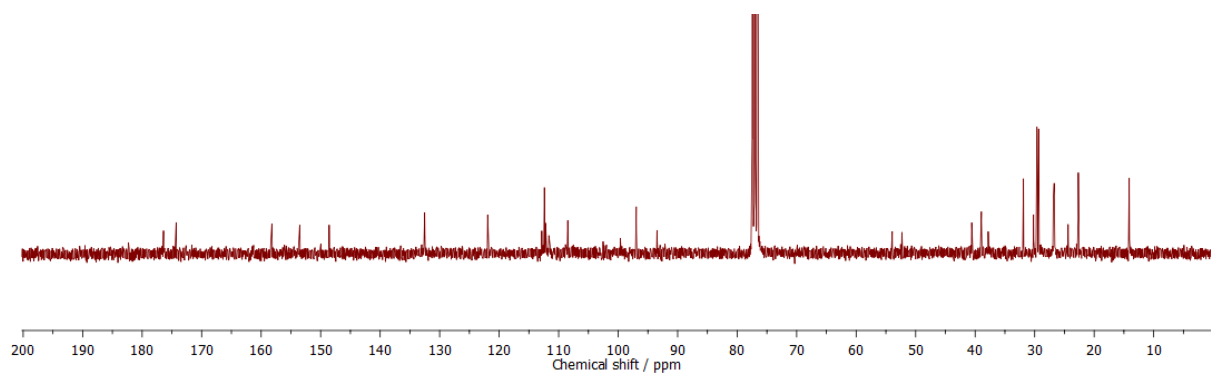

$^{13}\text{C}$  NMR spectrum of compound **3**,  $\text{CDCl}_3$ , 75 MHz

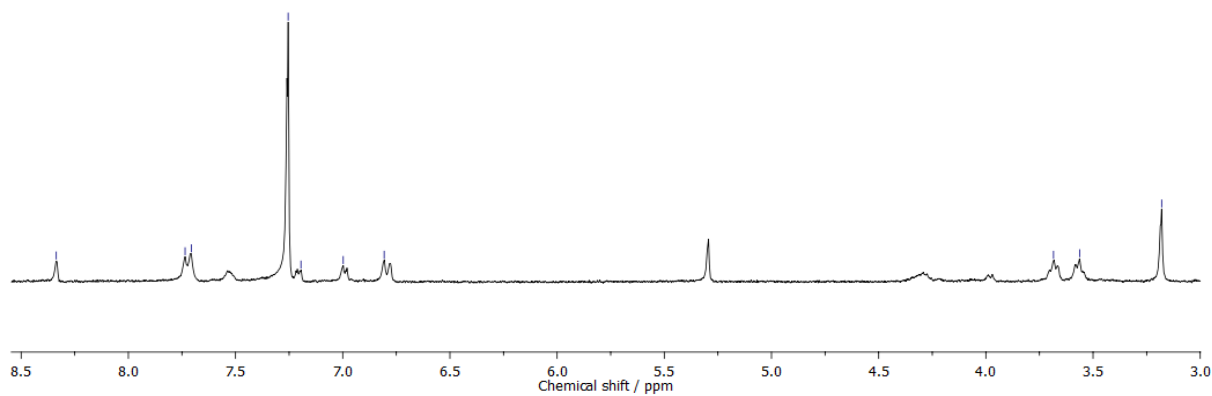

$^1\text{H}$  NMR spectrum of azide **6**,  $\text{CDCl}_3$ , 300 MHz

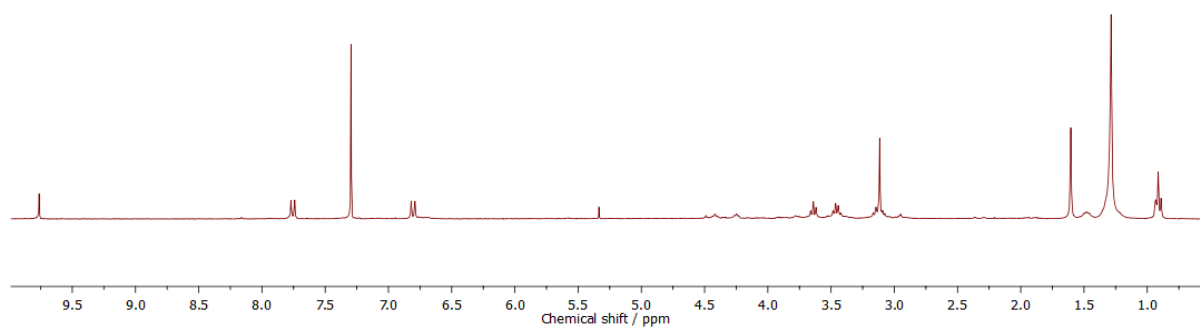

$^1\text{H}$  NMR spectrum of aldehyde **7**,  $\text{CDCl}_3$ , 300 MHz

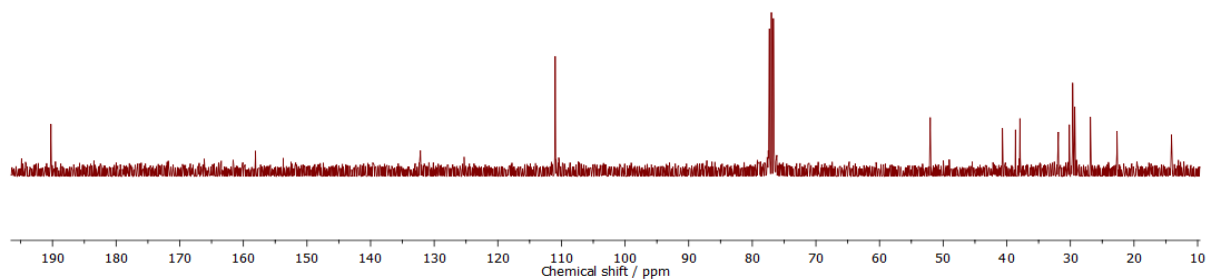

$^{13}\text{C}$  NMR spectrum of aldehyde **7**,  $\text{CDCl}_3$ , 75 MHz (magnitude processing from the MestReNova software)

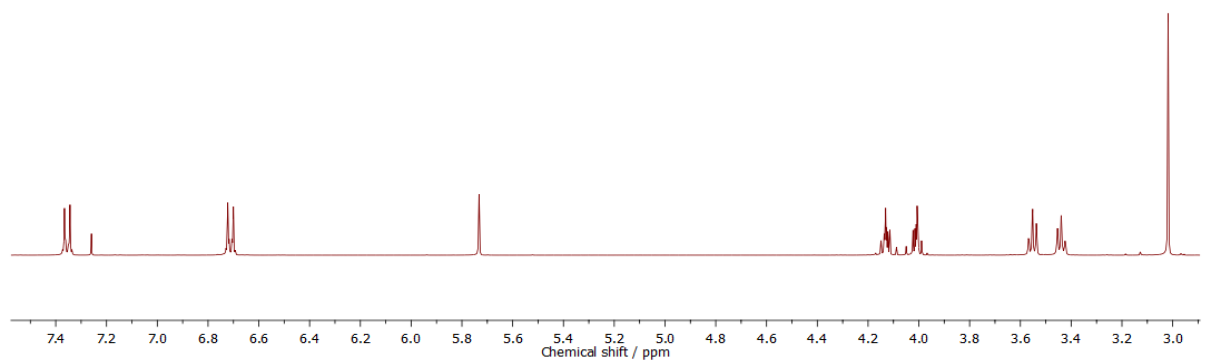

$^1\text{H}$  NMR spectrum of azide **8**,  $\text{CDCl}_3$ , 300 MHz

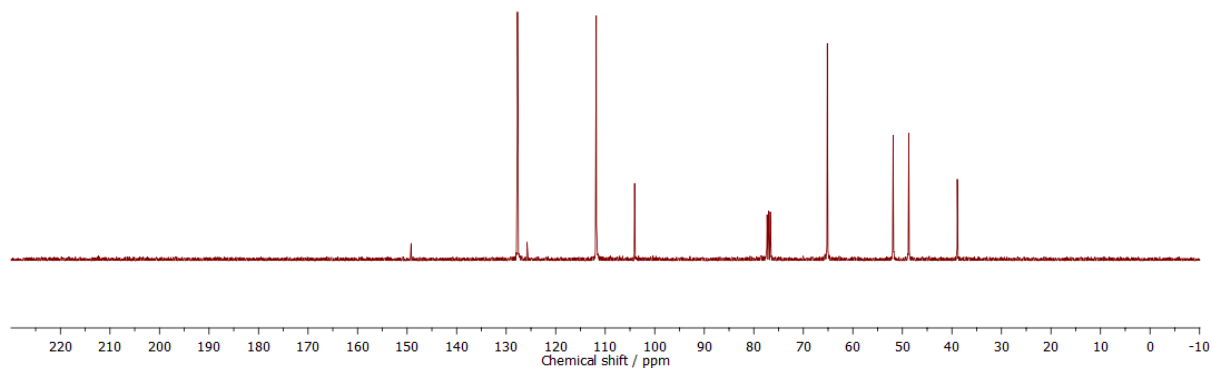

$^{13}\text{C}$  NMR spectrum of azide **8**,  $\text{CDCl}_3$ , 75 MHz (magnitude processing from the MestReNova software)

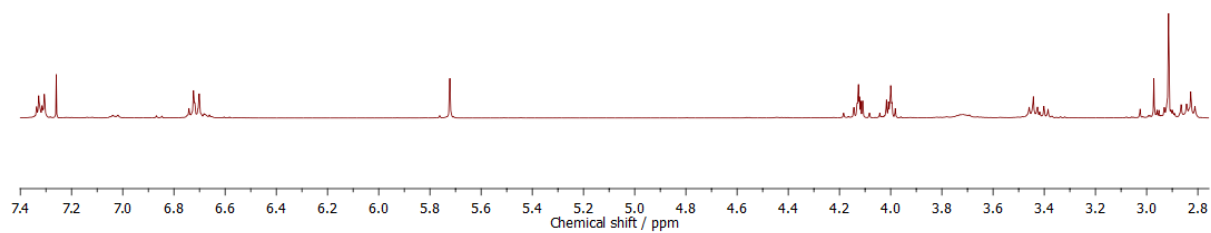

$^1\text{H}$  NMR spectrum of amine **9**,  $\text{CDCl}_3$ , 300 MHz

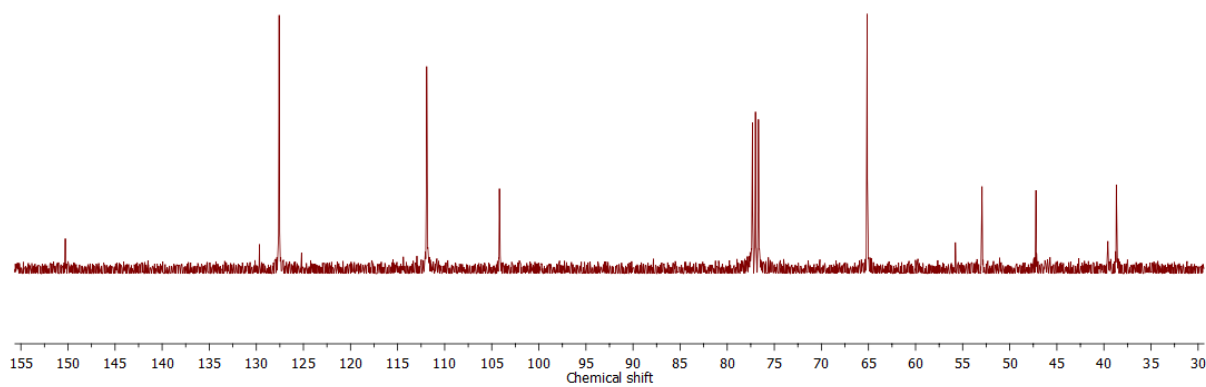

$^{13}\text{C}$  NMR spectrum of amine **9**,  $\text{CDCl}_3$ , 75 MHz

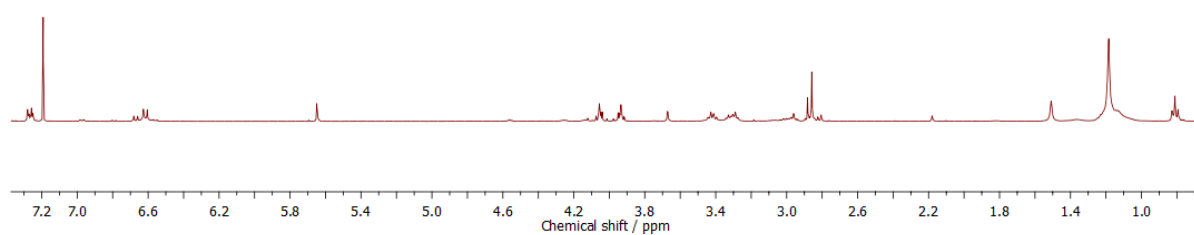

$^1\text{H}$  NMR spectrum of urea **10**,  $\text{CDCl}_3$ , 300 MHz
